# Supplementary material for: Identification of Novel Candidate Genes and Variants for Hearing Loss and Temporal Bone Anomalies
Source: PubMed Central journal article supplement (PMC8069784; doi:10.3390/genes12040566), 2021-04-13
Supplement: genes-12-00566-s001.pdf [file genes-12-00566-s001.pdf]

TABLE S1. Rare damaging variants identified in 15 Filipino children with hearing loss requiring cochlear implants

Bold=probable cause of hearing loss; Italics=probable cause of other phenotypes

| ID | Age   | Sex | AdditionalFeatures                                                                                       | FamilyHistory                                                                            | Genotype                                     | Variant                                                                                   | rsID                     | gnomAD_EAS(hg38) | gnomAD_highestMAF(hg38) | 1000Genomes          | GMEVariome | GenomeAsia100K_SEA | scaledCADD(hg38) | Damaging_dbNSFP41a | IMPC_gene/MouseHearingPhenotype | Literature on Known Phenotypes                                     | Missed in previous analyses with hg19-refSeq/gnomAD or dbNSFP33a                                                                                                                                                                                                                                   |                                                                                                                                                                                                                            |                                                                                                                                                                                                                                                          |                                                                                                                                                                                                                                                                                 |                                                                                                                                                                     |
|----|-------|-----|----------------------------------------------------------------------------------------------------------|------------------------------------------------------------------------------------------|----------------------------------------------|-------------------------------------------------------------------------------------------|--------------------------|------------------|-------------------------|----------------------|------------|--------------------|------------------|--------------------|---------------------------------|--------------------------------------------------------------------|----------------------------------------------------------------------------------------------------------------------------------------------------------------------------------------------------------------------------------------------------------------------------------------------------|----------------------------------------------------------------------------------------------------------------------------------------------------------------------------------------------------------------------------|----------------------------------------------------------------------------------------------------------------------------------------------------------------------------------------------------------------------------------------------------------|---------------------------------------------------------------------------------------------------------------------------------------------------------------------------------------------------------------------------------------------------------------------------------|---------------------------------------------------------------------------------------------------------------------------------------------------------------------|
| 1  | 3.95  | M   | EVA, L; brain cysts                                                                                      |                                                                                          | Heterozygous                                 | <b>DSPP:NM_014208:exon4:c.G730A:p.G244R</b>                                               | rs1044690454             | .                | .                       | .                    | .          | .                  | 0.001            | 24.3               | FA/mLr/mSVM/MT/PP2/SI           | NoEarPhenotype                                                     | PMID11175790: multiple Chinese families with hearing loss, one with EVA                                                                                                                                                                                                                            | No                                                                                                                                                                                                                         |                                                                                                                                                                                                                                                          |                                                                                                                                                                                                                                                                                 |                                                                                                                                                                     |
|    |       |     |                                                                                                          |                                                                                          | Heterozygous                                 | ANLN:NM_018685:exon11:c.G1921C:p.E641Q                                                    | rs748210737              | .                | 0.0015                  | EAS:0.0015           | .          | .                  | .                | .                  | .                               | 20.9                                                               | MA/PP2                                                                                                                                                                                                                                                                                             | NoKoMouse                                                                                                                                                                                                                  | PMCG93648: heterozygous missense variant co-segregating with branchio-oto-renal syndrome in Chinese family                                                                                                                                               | gnomAD MAF>0.001                                                                                                                                                                                                                                                                |                                                                                                                                                                     |
|    |       |     |                                                                                                          |                                                                                          | Potential Compound Heterozygous or Haplotype | ZNF462:NM_021224:[exon3:c.G3916A:p.G1306S]; [exon3:c.G4129A:p.E1377K]                     | NA; rs768977077          | NA; 0            | NA; NFE:0.0001          | .                    | .          | .                  | .                | .                  | .                               | 28.9; 24.8                                                         | LRT/MT/PP2/SI; LRT/MA/MT/PP2/SI                                                                                                                                                                                                                                                                    | Prewaning lethality                                                                                                                                                                                                        | PMCG935050: hearing loss or inner ear malformation (not specified) in 50% of Weiss-Kruszka syndrome patients with heterozygous loss-of-function variants in exon 3 of ZNF462                                                                             | No                                                                                                                                                                                                                                                                              |                                                                                                                                                                     |
|    |       |     |                                                                                                          |                                                                                          | Heterozygous                                 | CEP290:NM_025114:exon39:c.C5284T:p.R1762C                                                 | rs373307908              | .                | 0.0004                  | OTH:0.00096          | .          | .                  | .                | .                  | .                               | 0.013                                                              | 29.6                                                                                                                                                                                                                                                                                               | LRT/MT/PP2/PR/SI                                                                                                                                                                                                           | NoEarPhenotype                                                                                                                                                                                                                                           | PMCG2597962: heterozygous missense mutation in patient with Joubert syndrome including cystic kidney disease and hearing loss                                                                                                                                                   | No                                                                                                                                                                  |
| 3  | 2.83  | M   | Malformed cochlea with incomplete cochlear turns, B; EVA, L; global developmental delay                  |                                                                                          | Heterozygous                                 | <b>LMX1A:NM_177398:exon5:c.G606C:p.L202F</b>                                              | .                        | .                | .                       | .                    | .          | .                  | .                | 24.8               | FA/LRT/mLr/mSVM/MT/PP2/PR/SI    | PMCG511360: KO-hom but not het mice have cochleovestibular defects | PMCG5973959: heterozygous missense variants co-segregate with nonsyndromic hearing loss in two Dutch families; PMCG6094940: homozygous missense variant co-segregates with nonsyndromic hearing loss in Pakistani family; PMID32840933: functional heterozygous missense variant in Korean proband | No                                                                                                                                                                                                                         |                                                                                                                                                                                                                                                          |                                                                                                                                                                                                                                                                                 |                                                                                                                                                                     |
|    |       |     |                                                                                                          |                                                                                          | Potential Compound Heterozygous or Haplotype | USH2A:NM_206933:[exon47:c.G9286A:p.V3096M]; [exon46:c.C9109T:p.R3037C]                    | rs147267500; rs770418427 | 0; 0.0002        | AFR:0.0001; EAS:0.0002  | .                    | .          | .                  | .                | .                  | 0.007; 0.007                    | 18.3; 23.8                                                         | MA/MT/SI/PP2; LRT/MA/MT/PR/SI                                                                                                                                                                                                                                                                      | PMCI1838616: Ush2a-KO mice have progressive photoreceptor degeneration and moderate nonprogressive hearing loss                                                                                                            | MIM276901: AR Usher syndrome type 2A                                                                                                                                                                                                                     | Variant V3096M was ruled out in previous CLHNS screening due to MAF>0.01 (Truong et al. 2019)                                                                                                                                                                                   |                                                                                                                                                                     |
|    |       |     |                                                                                                          |                                                                                          | Heterozygous                                 | <b>ZFH4:NM_024721:exon10:c.G5119A:p.A1707T</b>                                            | rs764848741              | 0                | FIN:0.0002              | .                    | .          | .                  | .                | .                  | .                               | .                                                                  | 25.8                                                                                                                                                                                                                                                                                               | MT/PR/SI                                                                                                                                                                                                                   | NotPhenotyped                                                                                                                                                                                                                                            | PMCG3155189: 8q21.11 deletion including ZFH4 in 8 patients with sensorineural hearing loss; developmental delay may be present                                                                                                                                                  | No                                                                                                                                                                  |
|    |       |     |                                                                                                          |                                                                                          | Heterozygous                                 | <b>NRP1:NM_003873:exon10:c.G1655A:p.R552Q</b>                                             | rs757990959              | 0                | OTH:0.0005              | .                    | .          | .                  | .                | .                  | .                               | .                                                                  | 29.2                                                                                                                                                                                                                                                                                               | FA/LRT/MA/mLr/mSVM/MT/PP2/SI                                                                                                                                                                                               | Het-KO mice with abnormal ABR                                                                                                                                                                                                                            | PMCG5695633: conditional-KO mice with disorganized outer spiral bundles and enlarged microvessels of stria vascularis, progressive hearing loss                                                                                                                                 | No                                                                                                                                                                  |
|    |       |     |                                                                                                          |                                                                                          | Heterozygous                                 | <b>COL2A1:NM_001844:exon50:c.G3569A:p.R1190H</b>                                          | rs748549541              | .                | .                       | .                    | .          | .                  | .                | .                  | .                               | .                                                                  | 27.3                                                                                                                                                                                                                                                                                               | FA/LRT/mLr/mSVM/MT/PP2/PR/SI                                                                                                                                                                                               | PMID10100048: Tg-mice with small misshapen otic capsule                                                                                                                                                                                                  | MIM120140: multiple AD syndromes with hearing loss, including Stickler syndrome                                                                                                                                                                                                 | No                                                                                                                                                                  |
|    |       |     |                                                                                                          |                                                                                          | Hemizygous                                   | ARHGAP4:NM_001164741:exon18:c.G2175C:p.Q725H                                              | rs200637748              | 0.002            | EAS:0.002               | EAS:0.001            | .          | .                  | .                | .                  | .                               | .                                                                  | 21.4                                                                                                                                                                                                                                                                                               | MT/PR/SI                                                                                                                                                                                                                   | NoEarPhenotype                                                                                                                                                                                                                                           | PMID26707211: missense variant in child with intellectual disability; PMID2965914: deletion including ARHGAP4 in twins with intellectual disability                                                                                                                             | No; gnomAD MAF>0.001                                                                                                                                                |
| 5  | 3.84  | F   | HIB with dehiscence, L; neonatal infection; pervasive developmental delay                                |                                                                                          | Potential Compound Heterozygous or Haplotype | CCDC186:NM_153249:[exon3:c.A461C:p.K154T]; [exon3:c.G391A:p.A131T]                        | rs994643573; rs147799223 | 0.0004; 0.0004   | EAS:0.0004; 0.0004      | .                    | .          | .                  | .                | NA; NA             | 22.4; 15.4                      | LRT/MT/PP2/PR/SI; SI                                               | Prewaning lethality                                                                                                                                                                                                                                                                                | PMCG7818090, PMCG502059: homozygous variants in patients with global developmental delay                                                                                                                                   | Yes                                                                                                                                                                                                                                                      |                                                                                                                                                                                                                                                                                 |                                                                                                                                                                     |
|    |       |     |                                                                                                          |                                                                                          | Heterozygous                                 | <b>DMXL2:NM_015263:exon3:c.T257C:p.L86S</b>                                               | rs761692429              | 0.0002           | OTH:0.0005              | .                    | .          | .                  | .                | .                  | .                               | .                                                                  | 24.1                                                                                                                                                                                                                                                                                               | LRT/MT/SI/PP2                                                                                                                                                                                                              | Hom-KO Prewaning lethality, het-KO decreased bone mineral content                                                                                                                                                                                        | PMID27657680, PMID33715530: heterozygous missense variants cosegregating with AD hearing loss in Chinese and Cameroonian families                                                                                                                                               | No                                                                                                                                                                  |
|    |       |     |                                                                                                          |                                                                                          | Heterozygous                                 | ZFR2:NM_015174:exon19:c.C2653T:p.R885X                                                    | rs375337964              | .                | .                       | .                    | .          | .                  | .                | .                  | .                               | 0.001                                                              | 45                                                                                                                                                                                                                                                                                                 | MT                                                                                                                                                                                                                         | NoKoMouse                                                                                                                                                                                                                                                | PMID23610052: 19p13.3 deletions including ZFR2 in patients with intellectual disability or developmental delay, 40% with hearing loss                                                                                                                                           | Yes                                                                                                                                                                 |
|    |       |     |                                                                                                          |                                                                                          | Potential Compound Heterozygous or Haplotype | MCM3AP:NM_003906:[exon25:c.G5383A:p.A1795T]; [exon1:c.G998T:p.R333L]                      | rs17183290; rs17182552   | 0.004; 0.002     | EAS:0.004; EAS:0.002    | EAS:0.003; EAS:0.002 | .          | .                  | .                | .                  | 0.01; 0.01                      | 26.7; 22.5                                                         | LRT/MA/MT/PP2/SI; MA                                                                                                                                                                                                                                                                               | NoKoMouse                                                                                                                                                                                                                  | PMID32319184: AR Charcot-Marie-Tooth disease, including one Finnish patient with compound heterozygous variants and intellectual disability and hearing loss; PMCG477159: MCM3AP is required for inhibition of cellular DNA synthesis in viral infection | Yes; 1KG MAF>0.001                                                                                                                                                                                                                                                              |                                                                                                                                                                     |
| 6  | 10.81 | M   | PSCD + HIB, B; EVA, R; pneumonia, sinusitis, and progressive hearing loss                                | Hearing loss, paternal side                                                              | Heterozygous                                 | <b>DNAH14:NM_001367479:exon5:c.G8842T:p.A2948S</b>                                        | rs541854543              | 0.0004           | EAS:0.0004              | .                    | .          | .                  | .                | 0.003              | 23.9                            | PP2                                                                | NoKoMouse                                                                                                                                                                                                                                                                                          | PMID30125339: heterozygous deletion in patient with hydrocephalus and cognitive dysfunction; PMID3357779: compound heterozygous DNAH14 variants in Chinese proband with bronchiectasis, chronic sinusitis and otitis media | No                                                                                                                                                                                                                                                       |                                                                                                                                                                                                                                                                                 |                                                                                                                                                                     |
|    |       |     |                                                                                                          |                                                                                          | Heterozygous                                 | ATAD2B:NM_017552:exon4:c.A475G:p.I159V                                                    | rs912934573              | .                | .                       | .                    | .          | .                  | .                | .                  | .                               | .                                                                  | 20.3                                                                                                                                                                                                                                                                                               | FA/mLr/MT                                                                                                                                                                                                                  | Hom-KO mice with abnormal ABR (het not tested)                                                                                                                                                                                                           | No                                                                                                                                                                                                                                                                              |                                                                                                                                                                     |
|    |       |     |                                                                                                          |                                                                                          | Heterozygous                                 | ECT2:NM_001258315:exon15:c.G1579A:p.D527N                                                 | rs182472799              | 0.0002           | SAS:0.001               | EAS:0.001            | .          | .                  | .                | .                  | .                               | 0.01                                                               | 21.2                                                                                                                                                                                                                                                                                               | LRT/MT                                                                                                                                                                                                                     | Het-KO mice with abnormal ABR                                                                                                                                                                                                                            | No; gnomAD MAF>0.001                                                                                                                                                                                                                                                            |                                                                                                                                                                     |
|    |       |     |                                                                                                          |                                                                                          | Heterozygous                                 | TCOF1:NM_001135243:exon24:c.C3823T:p.R1275W                                               | rs768512539              | 0                | ASJ:0.0006              | .                    | .          | .                  | .                | .                  | 0 (SouthAsia=0.0007)            | 24.9                                                               | PP2/PR/SI                                                                                                                                                                                                                                                                                          | PMCG489999: het-mutant mice with severe craniofacial defects, middle ear cavitation and hearing loss                                                                                                                       | MIM154500: AD Treacher-Collins syndrome often with conductive hearing loss and cleft palate                                                                                                                                                              | Previously ruled out due to lack of craniofacial features in patient carrying the variant (Truong et al. 2019)                                                                                                                                                                  |                                                                                                                                                                     |
|    |       |     |                                                                                                          |                                                                                          | Heterozygous                                 | <b>PTPRQ:NM_001145026:exon40:c.T6179C:p.V2060A</b>                                        | rs375150180              | 0.00097          | EAS:0.00097             | EAS:0.003            | .          | .                  | .                | .                  | .                               | 0.017                                                              | 27.8                                                                                                                                                                                                                                                                                               | MT/SI                                                                                                                                                                                                                      | PMCG740823: rapid postnatal deterioration in cochlear hair-bundle structure                                                                                                                                                                              | PMCG599672: AD nonsyndromic hearing loss                                                                                                                                                                                                                                        | Yes                                                                                                                                                                 |
|    |       |     |                                                                                                          |                                                                                          | Heterozygous                                 | LRRK1:NM_024652:exon2:c.C16T:p.Q6X                                                        | rs772698984              | .                | .                       | .                    | .          | .                  | .                | .                  | .                               | .                                                                  | 33                                                                                                                                                                                                                                                                                                 | MT                                                                                                                                                                                                                         | PMCG4472125: Lrrk1-KO mice have severe osteopetrosis                                                                                                                                                                                                     | PMCG5348726: LRRK1 deficiency in humans and mice lead to increased bone mineral density, reduced body length and bone marrow, and sclerosis of vertebral endplates and pelvis; PMCG5769692: reports of AR osteosclerotic metaphyseal dysplasia due to homozygous LRRK1 variants | No                                                                                                                                                                  |
|    |       |     |                                                                                                          |                                                                                          | Heterozygous                                 | CPS1:NM_001875:exon27:c.3337-1G>T                                                         | .                        | .                | .                       | .                    | .          | .                  | .                | .                  | .                               | .                                                                  | .                                                                                                                                                                                                                                                                                                  | 34                                                                                                                                                                                                                         | MT                                                                                                                                                                                                                                                       | Prewaning lethality                                                                                                                                                                                                                                                             | MIM237300: AR carbamoyl phosphate synthetase I deficiency; PMID26440671: Includes hypertonia at presentation but may also have hypotonia and mild motor delay later |
| 7  | 8     | F   | HIB, L; OM, L; mild motor delay and hypotonia; history of urinary and upper respiratory tract infections | Older brother seen for giftedness; Down syndrome, maternal cousin; asthma, paternal side | Heterozygous                                 | <b>GMPPB:NM_013334:exon8:c.G1032C:p.E344D</b>                                             | .                        | .                | .                       | .                    | .          | .                  | .                | .                  | 23.9                            | MT/SI                                                              | NotPhenotyped                                                                                                                                                                                                                                                                                      | PMCG3710768, PMCG4843780: two patients with compound heterozygous GMPPB variants had muscle weakness, intellectual disability and sensorineural hearing loss                                                               | No                                                                                                                                                                                                                                                       |                                                                                                                                                                                                                                                                                 |                                                                                                                                                                     |
|    |       |     |                                                                                                          |                                                                                          | Heterozygous                                 | <b>TNXB:NM_019105:exon5:c.C2461T:p.R821X</b>                                              | rs749890642              | 0                | NFE:0.00006             | .                    | .          | .                  | .                | .                  | 0 (Oceania=0.007)               | 36                                                                 | LRT/MT                                                                                                                                                                                                                                                                                             | NoEarPhenotype                                                                                                                                                                                                             | MIM600985: AR Ehlers-Danlos syndrome (EDS), AD vesicoureteral reflux; PMID27253074: conductive or sensorineural hearing loss common in EDS                                                                                                               | No                                                                                                                                                                                                                                                                              |                                                                                                                                                                     |
|    |       |     |                                                                                                          |                                                                                          | Heterozygous                                 | PLEC:NM_201380:exon20:c.2868+1G>A                                                         | rs368904034              | .                | .                       | .                    | .          | .                  | .                | .                  | .                               | 0.001                                                              | 34                                                                                                                                                                                                                                                                                                 | MT                                                                                                                                                                                                                         | NotPhenotyped                                                                                                                                                                                                                                            | MIM601282: AR/AD epidermolysis bullosa simplex, AR limb-girdle muscular dystrophy                                                                                                                                                                                               | No                                                                                                                                                                  |
|    |       |     |                                                                                                          |                                                                                          | Heterozygous                                 | ARHGAP21:NM_020824:exon7:c.G475T:p.D159V                                                  | rs1266442941             | 0.0002           | EAS:0.0002              | .                    | .          | .                  | .                | .                  | .                               | .                                                                  | 29                                                                                                                                                                                                                                                                                                 | LRT/MT/PP2/PR/SI                                                                                                                                                                                                           | Het-KO mice with abnormal ABR                                                                                                                                                                                                                            | PMCG406497: candidate gene for autism                                                                                                                                                                                                                                           | No                                                                                                                                                                  |
|    |       |     |                                                                                                          |                                                                                          | Potential Compound Heterozygous or Haplotype | PCDH15:NM_001354411:exon29:c.C3787T:p.P1263S]; [CDH23:NM_022124:exon27:c.G3262A:p.V1088M] | rs775954124; rs200632520 | 0.004; 0.002     | EAS:0.004; EAS:0.002    | .                    | .          | .                  | .                | .                  | NA; 0.003                       | 24.9; 24.3                                                         | MA/MT/PP2/PR/SI; LRT/MA/mLr/mSVM/MT/PP2/SI                                                                                                                                                                                                                                                         | PMCG2858222: double-heterozygous mice with progressive hearing loss                                                                                                                                                        | PMCG2858222: compound heterozygous probands with congenital profound hearing loss                                                                                                                                                                        | No; gnomAD MAF>0.001                                                                                                                                                                                                                                                            |                                                                                                                                                                     |

|    |       |   |                                                                                                                                      |                                 |                                              |                                                                                                        |                                        |                |                                     |                          |                                               |                  |                           |                                                         |                                                                                                                                                                           |                                                                                                                                                                                                                                                                |                                                                                                    |                      |
|----|-------|---|--------------------------------------------------------------------------------------------------------------------------------------|---------------------------------|----------------------------------------------|--------------------------------------------------------------------------------------------------------|----------------------------------------|----------------|-------------------------------------|--------------------------|-----------------------------------------------|------------------|---------------------------|---------------------------------------------------------|---------------------------------------------------------------------------------------------------------------------------------------------------------------------------|----------------------------------------------------------------------------------------------------------------------------------------------------------------------------------------------------------------------------------------------------------------|----------------------------------------------------------------------------------------------------|----------------------|
|    |       |   |                                                                                                                                      |                                 | Heterozygous                                 | MYO7A:NM_000260:exon36:c.G4921A:p.E1641K                                                               | rs767975012                            | 0.0002         | EAS:0.0002                          |                          |                                               | 0.003            | 26.2                      | LRT/MT/PP2/PR                                           | AbsentPinnaReflex/AbnormalBone Mineralization(Hom); PMID15389316: mice heterozygous for missense variant have abnormal stereocilia bundles and low-frequency hearing loss | MIM276903: DFNA11; DFNB2; Usher syndrome IB                                                                                                                                                                                                                    | No                                                                                                 |                      |
|    |       |   |                                                                                                                                      |                                 | Heterozygous                                 | DNAJC17:NM_018163:exon11:c.A871G:p.I291V                                                               |                                        |                |                                     |                          |                                               |                  | 18.96                     | MA/MT/SI                                                | Het-KO mice with abnormal ABR                                                                                                                                             | PMID26355662: homozygous variant in family with retinitis pigmentosa and hypogammaglobulinemia                                                                                                                                                                 | No                                                                                                 |                      |
|    |       |   |                                                                                                                                      |                                 | Potential Compound Heterozygous or Haplotype | NEO1:NM_02499:[exon3:c.G586C:p.D196H]; [exon24:c.C3443T:p.S1148F]                                      | NA; rs1048863959                       | NA; 0          | NA; LAT:0.0007                      |                          |                                               |                  | 22.5; 25.9                | MT; LRT/MT/PP2/PR/SI                                    | NoKoMouse                                                                                                                                                                 | PMID31953991: included in critical 15q24 microdeletion associated with autism and variable hearing loss, recurrent infections                                                                                                                                  | No                                                                                                 |                      |
|    |       |   |                                                                                                                                      |                                 | Potential Compound Heterozygous or Haplotype | PIEZO2:NM_022068:[exon38:c.G5888A:p.R1963Q]; [exon37:c.C557T:p.R1853C]; [exon9:c.A1159G:p.S387G]       | rs1480686209; rs569343097; rs371514584 | 0; 0.0002; 0   | AFR:0.00002; ASJ:0.0003; SAS:0.0002 | NA; EUR:0.001; NA        | NA; 0.001 (Oceania=0.03); 0.01 (Oceania=0.10) | 25.6; 22.6; 24.6 | MA/MT/PR/SI; SI; LRT      | Prewaning lethality                                     | PMC5097934: biallelic variants in probands with arthrogyposis, respiratory insufficiency, muscular atrophy, scoliosis and mild distal sensory loss                        | No                                                                                                                                                                                                                                                             |                                                                                                    |                      |
| 8  | 3.03  | M | SSCD, L                                                                                                                              |                                 | Heterozygous                                 | COL11A1:NM_080629:exon58:c.A4364C:p.K1455T                                                             | rs769350133                            | 0.0004         | EAS:0.0004                          |                          |                                               |                  | 28.6                      | FA/LRT/mLr/mSVM/MT/PP2/PR/SI                            | DecreasedStartleReflex                                                                                                                                                    | MIM120280: DFNA37; AD Marshall Syndrome; AD Stickler                                                                                                                                                                                                           | No                                                                                                 |                      |
|    |       |   |                                                                                                                                      |                                 | Heterozygous                                 | ZFH4:NM_024721:exon3:c.G3007A:p.A1003T                                                                 | rs369411377                            | 0.002          | EAS:0.002                           |                          |                                               | 0.009            | 27.8                      | MT                                                      | NotPhenotyped                                                                                                                                                             | PMC3155189: 8q21.11 deletion including ZFH4 in 8 patients with sensorineural hearing loss                                                                                                                                                                      | No; gnomAD MAF>0.001                                                                               |                      |
|    |       |   |                                                                                                                                      |                                 | Heterozygous                                 | TECTA:NM_005422:exon10:c.C2967A:p.H989Q                                                                | rs200821009                            | 0.003          | EAS:0.003                           | EAS:0.003                |                                               |                  | 0.001                     | 20.4                                                    | FA/LRT/mLr/mSVM/MT/PP2/PR/SI                                                                                                                                              | PMc2869304: mice heterozygous for missense mutation have non-functional outer hair cells                                                                                                                                                                       | MIM602754: DFNA8/12; DFNB21                                                                        | No; gnomAD MAF>0.001 |
|    |       |   |                                                                                                                                      |                                 | Heterozygous                                 | CEP290:NM_025114:exon48:c.G6629A:p.R2210H                                                              | rs371833544                            | 0.0002         | ME:0.003                            |                          |                                               |                  | 23.2                      | LRT/MA/MT/PP2/PR/SI                                     | NoEarPhenotype                                                                                                                                                            | PMC2597962: heterozygous missense mutation in patient with Joubert syndrome including cystic kidney disease and hearing loss                                                                                                                                   | No                                                                                                 |                      |
| 9  | 8.19  | F | EVA, L                                                                                                                               |                                 | Heterozygous                                 | IST1:NM_001270976:exon8:c.C737G:p.P246R                                                                | rs774343604                            | 0.0002         | EAS:0.0002                          |                          |                                               |                  | 24                        | LRT/MT/PP2/PR/SI                                        | Het-KO mice with abnormal ABR                                                                                                                                             |                                                                                                                                                                                                                                                                | No                                                                                                 |                      |
| 13 | 5.95  | M | Global developmental delay                                                                                                           | Hearing loss, 3rd-degree cousin | Potential Compound Heterozygous or Haplotype | GDAP2:NM_017686:[exon14:c.A1463G:p.Y488C]; [exon2:c.C44T:p.T151]                                       | NA; rs1272520325                       | NA; 0          | NA; AFR:0.00002                     |                          |                                               |                  | 22.8; 19.8                | MT/SI; LRT                                              | AbsentPinnaReflex(Hom)                                                                                                                                                    | PMC7534050: AR adult-onset spinocerebellar ataxia                                                                                                                                                                                                              | No                                                                                                 |                      |
|    |       |   |                                                                                                                                      |                                 | Heterozygous                                 | SLC12A2:NM_001046:exon21:c.G2977T:p.E993X                                                              |                                        |                |                                     |                          |                                               |                  | 60                        | MT                                                      | PMID10369265: Slc12a2-mice are deaf                                                                                                                                       | MIM600840: DFNA78; AD Delpire-McNeill syndrome (global developmental delay and sensorineural hearing loss); AR Klippel syndrome                                                                                                                                | No                                                                                                 |                      |
|    |       |   |                                                                                                                                      |                                 | Homozygous                                   | ARMC4:NM_018076:exon5:c.A647G:p.N216S                                                                  | rs981525890                            | 0.0002         | EAS:0.0002                          |                          | 0 (Oceania=0.03)                              |                  | 13.99                     | SI                                                      | NoEarPhenotype                                                                                                                                                            | PMC3788828: AR primary ciliary dyskinesia, may include hearing loss due to primary ciliary dyskinesia                                                                                                                                                          | No                                                                                                 |                      |
| 18 | 2.77  | M |                                                                                                                                      |                                 | Heterozygous                                 | RERE:NM_012102:exon10:c.T910C:p.S304P                                                                  |                                        |                |                                     |                          |                                               | 0.001            | 27.6                      | MT/PP2/SI                                               | PMc3581587: heterozygous mice had decreased startle response and elevated ABR thresholds                                                                                  | PMc5903952: AD sensorineural hearing loss with eye, heart and renal defects                                                                                                                                                                                    | No                                                                                                 |                      |
|    |       |   |                                                                                                                                      |                                 | Heterozygous                                 | KRIT1:NM_194456:exon5:c.C74T:p.S25F                                                                    | rs779446044                            | 0              | OTH:0.0005                          |                          |                                               | 0.003            | 28.6                      | FA/LRT/MA/mLr/mSVM/MT/PP2/PR/SI                         | Het-/hom-KO have abnormal otic vesicle morphology                                                                                                                         | MIM604214: AD cavernous malformations                                                                                                                                                                                                                          | No                                                                                                 |                      |
|    |       |   |                                                                                                                                      |                                 | Potential Compound Heterozygous or Haplotype | CDH23:NM_022124:[exon11:c.G982A:p.A328T]; [exon20:c.G2236A:p.V746]                                     | rs374545987; rs550384315               | 0.00096; 0.001 | EAS:0.00096; EAS:0.001              | AMR: 0.0014; AMR: 0.0014 | 0.02; 0.01 (Oceania=0.06)                     | 28.4; 22.9       | LRT/MT/PP2/SI; LRT/PP2/MT | Hom-KO mice with absent pinna reflex                    | MIM605516: DFNB12; AR Usher 1D                                                                                                                                            | V746I was excluded due to CLHNS MAF=0.19 (Truong et al. 2019)                                                                                                                                                                                                  | No                                                                                                 |                      |
|    |       |   |                                                                                                                                      |                                 | Heterozygous                                 | MYO7A:NM_000260:exon36:c.G4921A:p.E1641K                                                               | rs767975012                            | 0.0002         | EAS:0.0002                          |                          |                                               |                  | 0.003                     | 26.2                                                    | LRT/MT/PP2/PR                                                                                                                                                             | AbsentPinnaReflex/AbnormalBone Mineralization(Hom); PMID15389316: mice heterozygous for missense variant have abnormal stereocilia bundles and low-frequency hearing loss                                                                                      | MIM276903: DFNA11; DFNB2; Usher syndrome IB                                                        | No                   |
|    |       |   |                                                                                                                                      |                                 | Potential Compound Heterozygous or Haplotype | NFRKB:NM_006165:[exon22:c.C3191G:p.T1064S]; [NM_006165:exon20:c.C2408T:p.P803L]                        | rs559022552; rs557840039               | 0.003; 0.003   | EAS:0.003; EAS:0.003                | EAS:0.002; EAS:0.002     |                                               |                  | 19.7; 24.4                | LRT; LRT/MT/PP2/SI                                      | NoKoMouse                                                                                                                                                                 | PMC2648978: NFRKB included in submicroscopic deletion in 11q24-25 in patients with hearing loss and multiple anomalies                                                                                                                                         | No                                                                                                 |                      |
| 19 | 5.66  | F | Malformed cochlea, vestibules and semicircular canals, B; absent cochlear and inferior vestibular nerves, R                          |                                 | Heterozygous                                 | PPOX:NM_000309:exon5:c.A394T:p.R132W                                                                   | rs771307571                            | 0.0002         | EAS:0.0002                          |                          |                                               |                  | 24.5                      | FA/mLr/mSVM/MT/PP2/PR/SI                                | Het-KO mice with abnormal ABR                                                                                                                                             | MIM600923: AD porphyria variegata (1 case report of sudden hearing loss in a porphyria variegata patient)                                                                                                                                                      | No                                                                                                 |                      |
|    |       |   |                                                                                                                                      |                                 | Potential Compound Heterozygous or Haplotype | GOLGB1:NM_001256486:[exon14:c.G7472A:p.R2491Q]; [exon14:c.A7367C:p.E2456A]; [exon14:c.C7112G:p.S2371C] | rs767375937; rs751018606; rs919070773  | 0; 0.0002; NA  | AFR:0.00002; EAS:0.0002; NA         |                          |                                               |                  | 24.8; 25.9; 26.2          | LRT/MA/MT/PP2/SI; LRT/MA/MT/PP2/PR/SI; LRT/MA/MT/PP2/SI | PMID2185186: osteochondrodysplasia; PMc4958322: palatal shelf defects                                                                                                     |                                                                                                                                                                                                                                                                | No                                                                                                 |                      |
|    |       |   |                                                                                                                                      |                                 | Heterozygous                                 | SLC36A1:NM_078483:exon7:c.C721T:p.Q241X                                                                |                                        |                |                                     |                          |                                               |                  | 47                        | LRT/MT                                                  | KO-het abnormal craniofacial morphology                                                                                                                                   |                                                                                                                                                                                                                                                                | No                                                                                                 |                      |
|    |       |   |                                                                                                                                      |                                 | Heterozygous                                 | TFEB:NM_001167827:exon2:c.C136G:p.H46D                                                                 |                                        |                |                                     |                          |                                               |                  | 22.6                      | MT/PR/SI                                                | Het-KO mice with abnormal ABR; decreased BMD                                                                                                                              | PMCID: attenuates spiral ganglion neuron degeneration                                                                                                                                                                                                          | No                                                                                                 |                      |
|    |       |   |                                                                                                                                      |                                 | Heterozygous                                 | GDPD5:NM_030792:exon7:c.C404T:p.T135M                                                                  | rs373413383                            | 0              | AFR:0.00002                         |                          | 0.01 (Oceania=0.07)                           |                  | 24.8                      | LRT/MA/MT/PP2                                           | Hom-KO mice with abnormal ABR (het not tested)                                                                                                                            |                                                                                                                                                                                                                                                                | No                                                                                                 |                      |
|    |       |   |                                                                                                                                      |                                 | Heterozygous                                 | MYO18B:NM_032608:exon13:c.C255T:p.A852V                                                                |                                        |                |                                     |                          |                                               |                  | 26.1                      | FA/LRT/mLr/mSVM/MA/MT/PP2/PR/SI                         | Het-KO mice with abnormal ABR                                                                                                                                             | MIM616549: AR Klippel-Feil syndrome with nemaline myopathy and facial dysmorphism; PMc5885878: hearing loss common in KFS; PMID18722888: 60% of Klippel-Feil HL patients with ear anomalies including inner ear dysplasia and deformed internal acoustic canal | No                                                                                                 |                      |
| 20 | 14.59 | F | Fluctuating hearing loss with steeply sloping audiogram prior to C1; turbinate hypertrophy, allergic rhinitis, nasopharyngeal nodule |                                 | Heterozygous                                 | ARHGAP29:NM_004815:exon17:c.G1847A:p.R616H                                                             | rs374991521                            | 0.001          | OTH:0.001                           |                          |                                               |                  | 25.3                      | FA/MA/mLr/mSVM/MT/PP2/PR/SI                             | Het-KO mice with abnormal ABR                                                                                                                                             | PMC3501616: cleft lip and palate                                                                                                                                                                                                                               | No; gnomAD MAF>0.001                                                                               |                      |
|    |       |   |                                                                                                                                      |                                 | Heterozygous                                 | CACNA1S:NM_000069:exon12:c.G1745C:p.G582A                                                              | rs377459546                            | 0.0008         | LAT:0.001                           |                          |                                               | 0.004            | 26                        | FA/LRT/MA/mLr/mSVM/MT/PP2/PR/SI                         | Het-KO mice with abnormal ABR                                                                                                                                             | MIM170400: AD hypokalemic periodic paralysis                                                                                                                                                                                                                   | No; gnomAD MAF>0.001                                                                               |                      |
|    |       |   |                                                                                                                                      |                                 | Heterozygous                                 | DSPP:NM_014208:exon5:c.G1577A:p.S526N                                                                  | rs201485801                            | 0.001          | EAS:0.001                           | EAS:0.003                |                                               | 0.02             | 13                        | FA/mLr/mSVM/PP2/SI                                      | NoEarPhenotype                                                                                                                                                            | PMID1175790: multiple Chinese families with hearing loss, one with EVA                                                                                                                                                                                         | No; gnomAD MAF>0.001                                                                               |                      |
|    |       |   |                                                                                                                                      |                                 | Heterozygous                                 | CEP290:NM_025114:exon8:c.G503A:p.R168H                                                                 | rs200063017                            | 0.003          | EAS:0.003                           |                          | NEA:0.001                                     | 0.003            | 22.7                      | FA/SI                                                   | NoEarPhenotype                                                                                                                                                            | PMC2597962: heterozygous missense mutation in patient with Joubert syndrome including cystic kidney disease and hearing loss                                                                                                                                   | No; gnomAD MAF>0.001                                                                               |                      |
|    |       |   |                                                                                                                                      |                                 | Heterozygous                                 | BCL2L10:NM_020396:exon1:c.C414A:p.C138X                                                                | rs79743288                             | 0.0006         | EAS:0.0006                          |                          |                                               |                  | 36                        | MT                                                      | NoKoMouse                                                                                                                                                                 | PMc6817556: GWAS locus for age-related hearing loss                                                                                                                                                                                                            | No                                                                                                 |                      |
|    |       |   |                                                                                                                                      |                                 | Homozygous                                   | CLDN9:NM_020982:exon1:c.C75G:p.C25W                                                                    | rs368045321                            | 0.0004         | OTH:0.0005                          |                          |                                               | 0.004            | 20.6                      | FA/LRT/MA/mLr/mSVM/MT/PP2/PR/SI                         | PMc2720454: AR deafness with loss of sensory cells                                                                                                                        | PMc6745279: AR nonsyndromic hearing loss                                                                                                                                                                                                                       | No                                                                                                 |                      |
|    |       |   |                                                                                                                                      |                                 | Heterozygous                                 | ANKRD11:NM_013275:exon9:c.A3830G:p.E1277G                                                              |                                        |                |                                     |                          |                                               |                  | 24.5                      | LRT/MA/MT/PP2/PR/SI                                     | Het-KO mice with abnormal ABR                                                                                                                                             | MIM148050: AD KBG syndrome, may include hearing loss in 1/3, also craniofacial dysmorphisms, susceptibility to nasopharyngeal carcinoma                                                                                                                        | No                                                                                                 |                      |
|    |       |   |                                                                                                                                      |                                 | Heterozygous                                 | FLNA:NM_00110556:exon39:c.A6350G:p.N21175                                                              | rs375205247                            | 0.002          | EAS:0.002                           |                          |                                               |                  | 20.2                      | FA/LRT/MT/PR                                            | NoKoMouse                                                                                                                                                                 | MIM311300: otopalatodigital syndrome inc. hearing loss                                                                                                                                                                                                         | No; gnomAD MAF>0.001                                                                               |                      |
|    |       |   |                                                                                                                                      |                                 | Potential Compound Heterozygous or Haplotype | PATJ:NM_176877:[exon11:c.C1351G:p.R451G]; [exon34:c.4461+1G>A]                                         | rs117405402; rs19981703                | 0.003; 0.003   | EAS:0.003; EAS:0.003                | EAS:0.003; EAS:0.004     |                                               | 0.007; 0.01      | 25.3; 32                  | LRT/MA/MT/PP2/PR/SI; MT                                 | Hom-KO mice with abnormal startle reflex (late adult)                                                                                                                     |                                                                                                                                                                                                                                                                | Yes; gnomAD MAF>0.001                                                                              |                      |
|    |       |   |                                                                                                                                      |                                 | Heterozygous                                 | ARID1B:NM_001346813:exon20:c.G5648A:p.R1883H                                                           | rs758748419                            | 0              | FIN:0.00009                         |                          | 0 (SouthAsia=0.0007)                          |                  | 23.2                      | LRT/MA/MT/PP2/PR/SI                                     | Prewaning lethality                                                                                                                                                       | MIM614556: AD Coffin-Siris syndrome                                                                                                                                                                                                                            | No                                                                                                 |                      |
|    |       |   |                                                                                                                                      |                                 | Heterozygous                                 | MYO3A:NM_017433:exon32:c.C4483T:p.R1495X                                                               | rs371876274                            | 0.0002         | SAS:0.001                           | SAS:0.002                |                                               |                  | 41                        | LRT/MT                                                  | Hom-KO mice with abnormal ABR (het not tested)                                                                                                                            | MIM606808: DFNB30                                                                                                                                                                                                                                              | No; gnomAD MAF>0.001; previously ruled out due to lack of second allele explaining AR hearing loss |                      |
|    |       |   |                                                                                                                                      |                                 | Heterozygous                                 | CBLN3:NM_001039771:exon3:c.C550T:p.R184C                                                               | rs562291434                            | 0.0002         | EAS:0.0002                          |                          |                                               |                  | 32                        | LRT/MT/PP2/PR/SI                                        | Het-KO mice with abnormal ABR                                                                                                                                             |                                                                                                                                                                                                                                                                | No                                                                                                 |                      |

|    |      |   |                                                                                                                            |                                                |                                              |                                                                                                 |                                       |                   |                           |                   |  |                          |                     |                  |                                                    |                                                                                                                                                            |                                                                                                                                                              |                                                                                                                                                                                                                                                                |                      |
|----|------|---|----------------------------------------------------------------------------------------------------------------------------|------------------------------------------------|----------------------------------------------|-------------------------------------------------------------------------------------------------|---------------------------------------|-------------------|---------------------------|-------------------|--|--------------------------|---------------------|------------------|----------------------------------------------------|------------------------------------------------------------------------------------------------------------------------------------------------------------|--------------------------------------------------------------------------------------------------------------------------------------------------------------|----------------------------------------------------------------------------------------------------------------------------------------------------------------------------------------------------------------------------------------------------------------|----------------------|
|    |      |   |                                                                                                                            |                                                | Heterozygous                                 | HOXB6:NM_018952:exon3:c.T405A:p.N135K                                                           | rs758723592                           |                   |                           |                   |  |                          |                     | 25.6             | FA/LRT/MA/mLR/mSVM/MT/PP2/PR/SI                    | PMID1358998: gain-of-function mutant with early postnatal lethality, craniofacial/axial skeletal anomalies, cleft palate, microtia, skull bone defects etc |                                                                                                                                                              | Yes                                                                                                                                                                                                                                                            |                      |
|    |      |   |                                                                                                                            |                                                | Heterozygous                                 | GREB1L:NM_001142966:exon22:c.C3798G:p.S1266R                                                    | rs954005555                           | 0.0006            | EAS:0.0006                |                   |  |                          |                     | 0.003            | 16.6                                               | LRT/MA/MT/PR/SI                                                                                                                                            | Prewaning lethality                                                                                                                                          | PMC7349314: AD profound sensorineural hearing loss, variable genitourinary findings                                                                                                                                                                            | No                   |
|    |      |   |                                                                                                                            |                                                | Heterozygous                                 | TRMT1:NM_017722:exon4:c.C619T:p.Q207X                                                           |                                       |                   |                           |                   |  |                          |                     |                  | 36                                                 | MT                                                                                                                                                         | Prewaning lethality; PMID33499731: subcellular relocation of RNA modification enzymes may play a role in neuronal plasticity and transmission of information | PMID30289604: intellectual disability, microcephaly, brain anomalies; PMC7981843: includes hearing loss                                                                                                                                                        | No                   |
|    |      |   |                                                                                                                            |                                                | Heterozygous                                 | SALL4:NM_020436:exon4:c.C2782T:p.R928C                                                          | rs201682235                           | 0                 | ASJ:0.0003                | AMR:0.001         |  |                          |                     |                  | 27.7                                               | LRT/MA/MT/PP2/PR/SI                                                                                                                                        | PMID16790473: SALL4 haploinsufficiency led to anorectal/heart anomalies, exencephaly and kidney agenesis                                                     | MIM607343: AD sensorineural hearing loss due to Duane-radial ray syndrome or IVIC syndrome                                                                                                                                                                     | No; 1KG MAF>0.001    |
| 23 | 4.61 | F |                                                                                                                            | Hearing loss, uncle of grandfather             | Potential Compound Heterozygous or Haplotype | CDH23:NM_022124:[exon7:c.C437T:p.P146L]; [exon27:c.G3262A:p.V1088M]; [exon48:c.G6911A:p.R2304Q] | rs765103490; rs200632520; rs201434373 | NA; 0.002; 0.0015 | NA; EAS:0.002; EAS:0.0015 | NA; NA; EAS:0.001 |  |                          | 0.001; 0.003; 0.007 | 24.7; 24.3; 22.7 | LRT/MT/PP2/PR/SI; LRT/MA/mLR/mSVM/MT/PP2/SI; MT/SI | KO-hom abnormal righting response, abnormal gait, absent pinna reflex; PMID11138008: disrupted stereocilia organization                                    | MIM605516: DFNB12; AR Usher 1D                                                                                                                               | No; gnomAD MAF>0.001; previously ruled out due to lack of second allele explaining AR hearing loss                                                                                                                                                             |                      |
|    |      |   |                                                                                                                            |                                                | Potential Compound Heterozygous or Haplotype | ERC4:NM_005236:[exon8:c.A1483G:p.T495A]; [exon11:c.C2545G:p.Q849E]                              | NA; rs374186605                       | NA; 0.001         | NA; EAS:0.001             |                   |  |                          | NA; 0.01            | 21.9; 22         | LRT/MA/MT; LRT/MA/MT/PP2                           | Prewaning lethality                                                                                                                                        | MIM278760: AR Cockayne syndrome with hearing loss                                                                                                            | No; gnomAD MAF>0.001                                                                                                                                                                                                                                           |                      |
|    |      |   |                                                                                                                            |                                                | Heterozygous                                 | MYO18B:NM_032608:exon8:c.G1982A:p.W661X                                                         | rs372939044                           | 0                 | AFR:0.0005                |                   |  |                          |                     |                  | 44                                                 | LRT/MT                                                                                                                                                     | Het-KO mice with abnormal ABR                                                                                                                                | MIM616549: AR Klippel-Feil syndrome with nemaline myopathy and facial dysmorphism; PMCS588578: hearing loss common in KFS; PMID18722888: 60% of Klippel-Feil HL patients with ear anomalies including inner ear dysplasia and deformed internal acoustic canal | No                   |
| 24 | 6.1  | M | EVA, B; fever, jaundice, foul umbilical discharge and apneic episodes with antibiotics and phototherapy in neonatal period |                                                | Hemizygous                                   | FLNA:NM_00110556:exon39:c.A6350G:p.N21175                                                       | rs375205247                           | 0.002             | EAS:0.002                 |                   |  |                          |                     |                  | 20.2                                               | FA/LRT/MT/PR                                                                                                                                               | NoKOMouse                                                                                                                                                    | MIM311300: otopalatodigital syndrome inc. hearing loss; PMC2957847; PMID15654694: Melnick-Needles syndrome includes skull base sclerosis                                                                                                                       | No; gnomAD MAF>0.001 |
|    |      |   |                                                                                                                            |                                                | Hemizygous                                   | G6PD:NM_000402:exon11:c.C1450T:p.R484C                                                          | rs398123546                           | 0.0006            | SAS:0.0007                | SAS:0.001         |  |                          |                     |                  | 31                                                 | FA/LRT/MA/mLR/mSVM/MT/PP2/PR/SI                                                                                                                            | PMCT744953: G6pd overexpression protects from hearing loss progression                                                                                       | MIM300908: hemolytic anemia                                                                                                                                                                                                                                    | No; 1KG MAF>0.001    |
| 27 | 7.72 | F | EVA, B; OM, L                                                                                                              | Hearing loss, 2nd-degree cousin, paternal side | Heterozygous                                 | MUC1:NM_001204288:exon6:c.G453A:p.W151X                                                         | rs369649894                           | 0                 | LAT:0.00007               |                   |  |                          | 0.009               | 8.35             | PP2/PR/SI                                          | NoKOMouse                                                                                                                                                  | MIM158340: AD kidney disease; PMID12560150: Muc1 expressed in MEE from patients with otitis media                                                            | No                                                                                                                                                                                                                                                             |                      |
|    |      |   |                                                                                                                            |                                                | Heterozygous                                 | ADAM28:NM_014265:exon7:c.577-1G>A                                                               | rs370669549                           | 0.0002            | EAS:0.0002                |                   |  |                          | 0.006               | 32               | MT                                                 | NoKOMouse                                                                                                                                                  | PMID23640157: ADAM28 was screened but was negative for AD progressive bone disorder of skull which may include nerve entrapment leading to hearing loss      | No                                                                                                                                                                                                                                                             |                      |
|    |      |   |                                                                                                                            |                                                | Potential Compound Heterozygous or Haplotype | MADD[NM_130470:exon14:c.T2458G:p.S820A]; [exon26:c.T4046A:p.V1349E]                             | rs778218513; rs756795627              | 0.0002; 0.0002    | EAS:0.0002; EAS:0.0002    |                   |  | NA; 0.006                |                     | 27.2; 23.4       | LRT/MT/PP2/SI; MT/PP2/PR/SI                        | NoKOMouse                                                                                                                                                  | MIM603584: AR neurodevelopmental disorder with dysmorphic facies, impaired speech, hypotonia                                                                 | No                                                                                                                                                                                                                                                             |                      |
|    |      |   |                                                                                                                            |                                                | Potential Compound Heterozygous or Haplotype | GDPD5:NM_030792:[exon8:c.G554A:p.R185H]; [exon7:c.C404T:p.T135M]                                | rs745585758; rs373413383              | 0.002; 0          | ME:0.003; AFR:0.00002     |                   |  | 0 (SouthAsia=0.0007); NA |                     | 23.1; 24.8       | LRT/MT/PP2; LRT/MA/MT/PP2                          | Hom-KO mice with abnormal ABR (het not tested)                                                                                                             |                                                                                                                                                              | No; gnomAD MAF>0.001                                                                                                                                                                                                                                           |                      |
|    |      |   |                                                                                                                            |                                                | Heterozygous                                 | SNAP29:NM_004782:exon5:c.C766T:p.R256X                                                          | rs148156702                           | 0.001             | EAS:0.001                 | EAS:0.001         |  |                          |                     |                  | 38                                                 | LRT/MT                                                                                                                                                     | Het-KO mice with increased BMD                                                                                                                               | MIM609528: AR cerebral dysgenesis, neuropathy, ichthyosis, palmoplantar keratoderma syndrome                                                                                                                                                                   | No; gnomAD MAF>0.001 |
